# Supplementary material
Source: publisher site journal article supplement (http://www.e-cmh.org/upload/media/cmh-2021-0188-suppl12.pdf)
Supplement: Supplementary file 1 [file cmh-2021-0188-suppl12.pdf]

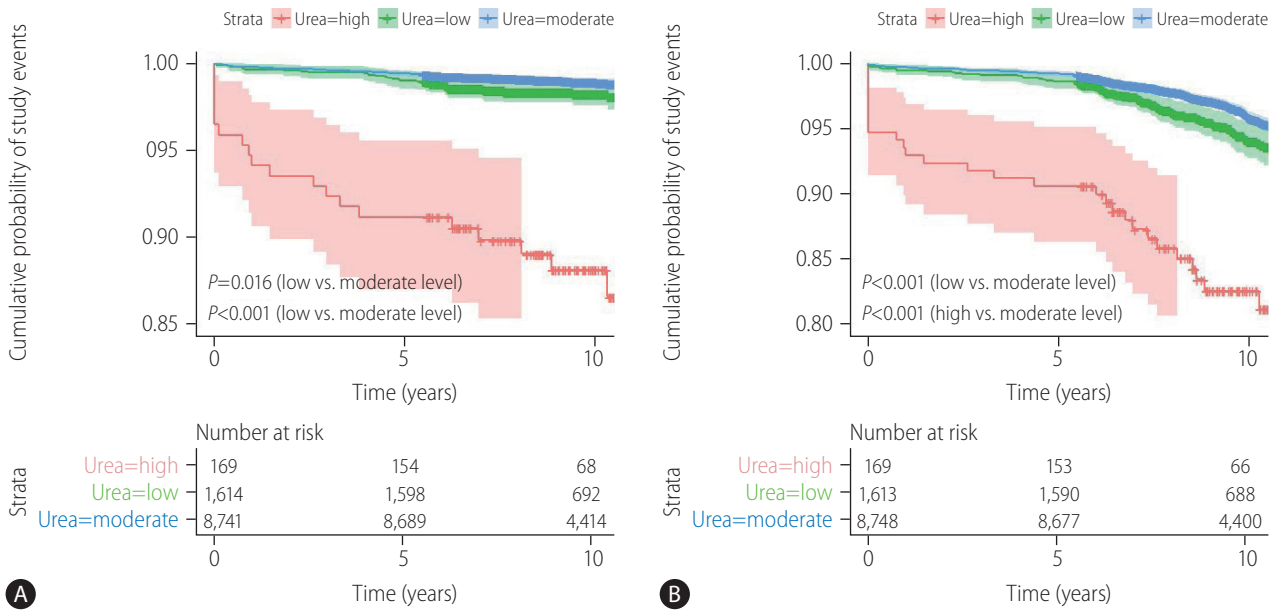

**Supplementary Figure 5.** Kaplan-Meier analysis of the cumulative probability of (A) hepatic decompensation and (B) incident cirrhosis among patients with low ( $\leq 3.5$  mmol/L), moderate (3.6–9.9 mmol/L), or high ( $\geq 10$  mmol/L) urea levels in the nonalcoholic fatty liver disease cohort.
